# Supplementary material for: Tremella polysaccharides-coated zein nanoparticles for enhancing stability and bioaccessibility of curcumin
Source: PubMed Central journal article supplement — Curr Res Food Sci. 2022 Mar 23;5:611–8. doi: 10.1016/j.crfs.2022.03.008 (PMC8965909; doi:10.1016/j.crfs.2022.03.008), 2022-03-23
Supplement: mmc1.pdf [file mmc1.pdf]

## **Supplementary information**

For

### **Tremella polysaccharides-coated zein nanoparticles for enhancing stability and bioaccessibility of curcumin**

Duoduo Li<sup>a</sup>, Zihao Wei<sup>a,\*</sup>, Jialin Sun<sup>a</sup>, Changhu Xue<sup>a,b</sup>

<sup>a</sup> College of Food Science and Engineering, Ocean University of China, Qingdao  
266003, China

<sup>b</sup> Qingdao National Laboratory for Marine Science and Technology, Qingdao 266235,  
China

\* To whom correspondence should be addressed.

Corresponding author at: College of Food Science and Engineering, Ocean University  
of China, 5 Yushan Road, Qingdao, Shandong Province 266003, China.

Email: weizihao@ouc.edu.cn (Z. Wei)

To demonstrate the reliability of using a 426 nm to measure the curcumin concentration for this zein/TP system, we have monitored the visible spectrum of the sample at 400–600 nm using a UV-2355 spectrophotometer. The UV-visible spectra was shown in Fig. S1.

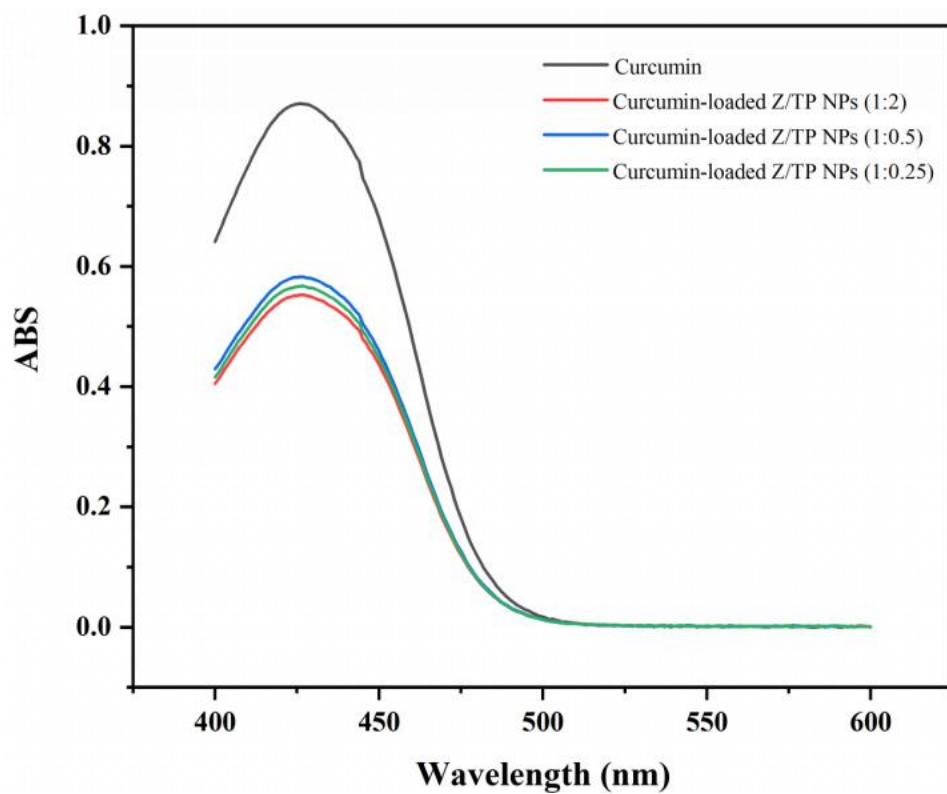

**Fig. S1** UV-visible spectra of curcumin and curcumin-loaded zein/TP nanoparticles dispersions.

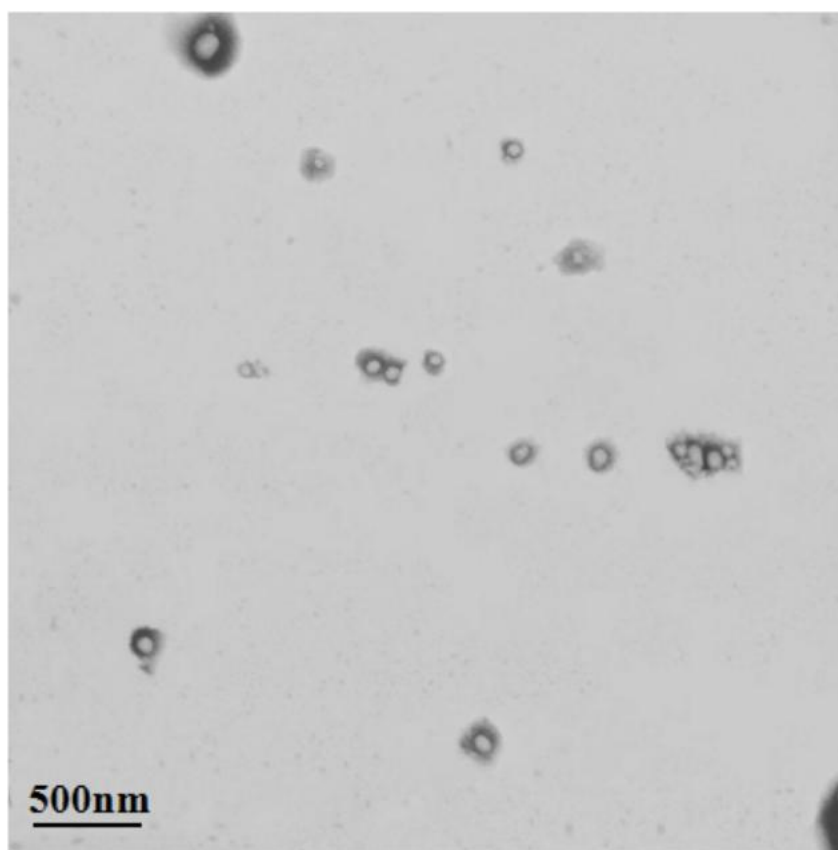

**Fig. S2** TEM image of curcumin-loaded zein/TP NPs with a mass ratio of 1:0.5.

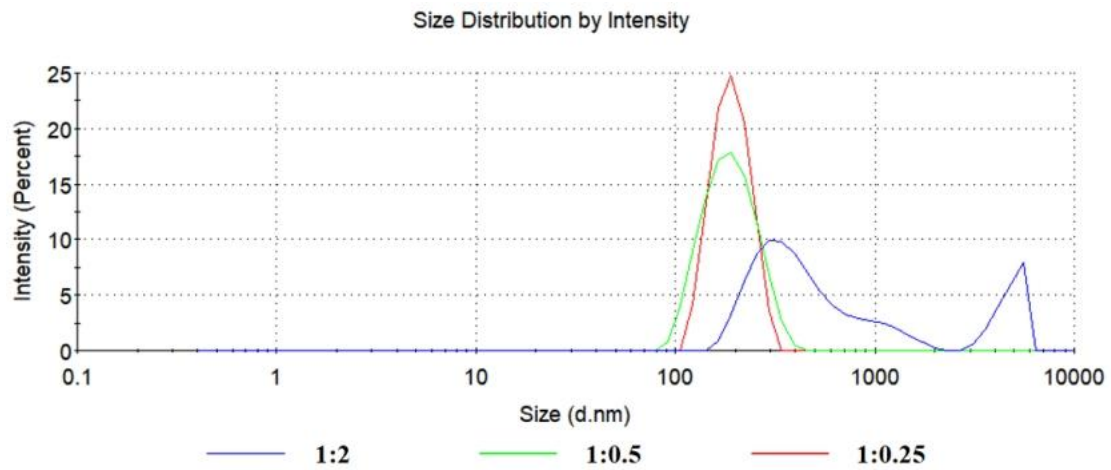

**Fig. S3** Particle size distribution of re-dispersed curcumin-loaded zein/TP NPs with different mass ratios.

**Table S1**

The particle size and PDI of re-dispersed curcumin-loaded zein/TP NPs with different mass ratios.

| Sample                   | Mass ratios of zein to TP | Particle size (nm)      | PdI                    |
|--------------------------|---------------------------|-------------------------|------------------------|
| Re-dispersed zein/TP NPs | 1:2                       | 473.5±75.2 <sup>c</sup> | 0.66±0.09 <sup>c</sup> |
|                          | 1:0.5                     | 184.2±9.0 <sup>a</sup>  | 0.21±0.01 <sup>a</sup> |
|                          | 1:0.25                    | 299.5±47.3 <sup>b</sup> | 0.51±0.08 <sup>b</sup> |

Different letters in the same column indicate significantly different ( $p < 0.05$ ).
